# Supplementary material for: Estimating the Gross Primary Production and Evapotranspiration of Rice Paddy Fields in the Sub-Tropical Region of China Using a Remotely-Sensed Based Water-Carbon Coupled Model
Source: MDPI journal article supplement (doi:10.3390/rs13173470), 2021-09-01
Supplement: s1 [file s1]

Archive with 1 entries (1 files):
- remotesensing-1319140-supplementary.pdf
