# Supplementary material for: Estimating the Gross Primary Production and Evapotranspiration of Rice Paddy Fields in the Sub-Tropical Region of China Using a Remotely-Sensed Based Water-Carbon Coupled Model
Source: MDPI journal article supplement (doi:10.3390/rs13173470), 2021-09-01
Supplement: s1 [file s1 › remotesensing-1319140-supplementary.pdf]

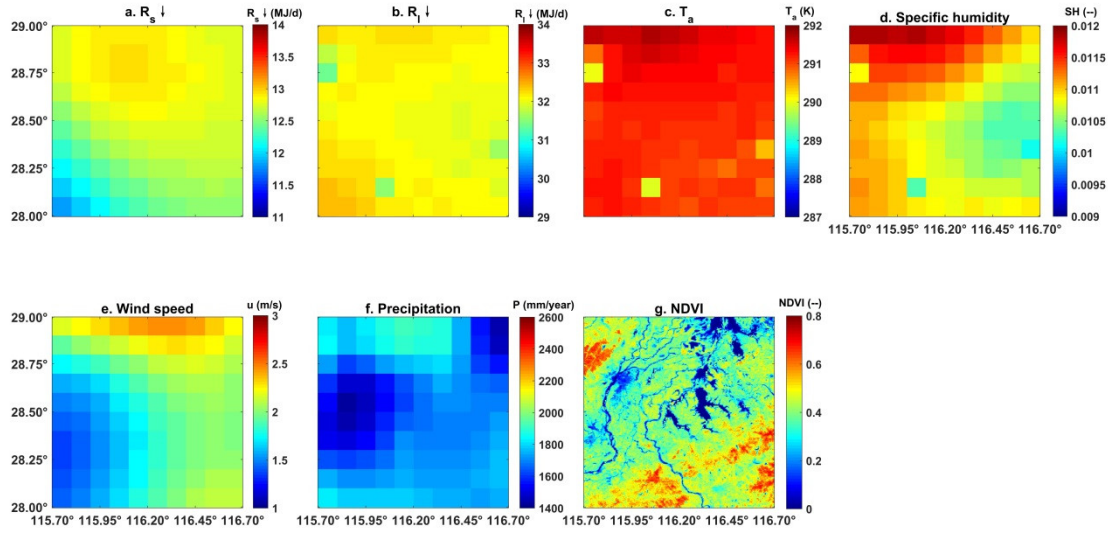

**Figure S1.** Regional distribution of annual averages of meteorological variables and NDVI in 2000.

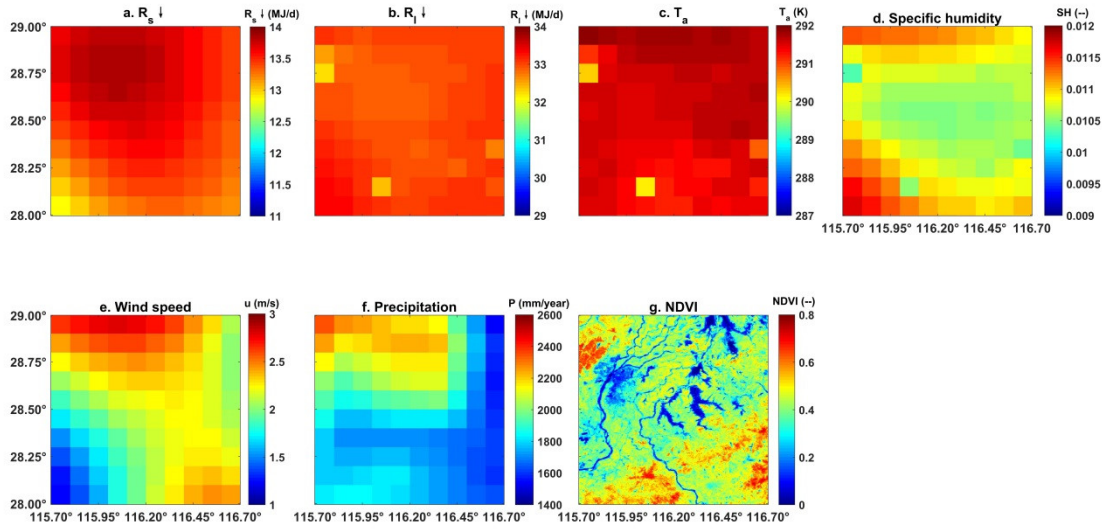

**Figure S2.** Regional distribution of annual averages of meteorological variables and NDVI in 2005.

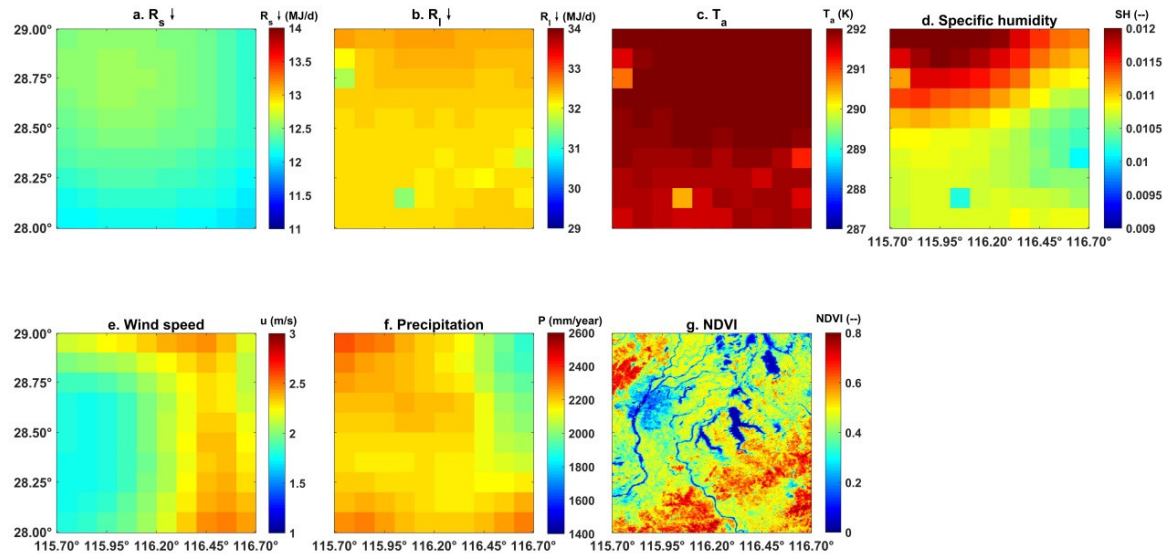

**Figure S3.** Regional distribution of annual averages of meteorological variables and NDVI in 2015.
